# Supplementary material for: Characterization of the Pore Filling of Solid State Dye Sensitized Solar Cells with Photoinduced Absorption Spectroscopy
Source: Hindawi journal article supplement (doi:10.1155/2011/513089), 2011-01-01
Supplement: f1 [file 513089.f1.pdf]

## Supporting Information

**Table 1.** Electrical characteristics for ssDSCs of various filling fractions.

| Sample name | Spiro-MeOTAD concentration<br>[mg mL <sup>-1</sup> ] | Overlayer thickness<br>[μm] | TiO <sub>2</sub> thickness<br>[μm] | Filling fraction<br>[%] | Voc<br>[mV] | Jsc<br>[mA/cm <sup>2</sup> ] | FF<br>[%] | η<br>[%] |
|-------------|------------------------------------------------------|-----------------------------|------------------------------------|-------------------------|-------------|------------------------------|-----------|----------|
| 12          | 200                                                  | 0.58                        | 2                                  | 89.4                    | 745.2       | 6.3                          | 46.8      | 2.2      |
| 16          | 200                                                  | 0.52                        | 2                                  | 89.5                    | 741.4       | 3.7                          | 61.2      | 1.7      |
| 35          | 200                                                  | 0.32                        | 3.1                                | 65.5                    | 734.9       | 5.7                          | 54.0      | 2.3      |
| 13          | 100                                                  | 0.19                        | 2                                  | 37.8                    | 731.3       | 5.2                          | 58.7      | 2.2      |
| 32          | 100                                                  | 0.01                        | 3                                  | 28.6                    | 718.8       | 5.2                          | 57.0      | 2.1      |
| 15          | 25                                                   | 0.00                        | 2.3                                | 8.3                     | 356.3       | 0.4                          | 32.9      | 0.0      |
| 34          | 25                                                   | 0.00                        | 3.7                                | 6.1                     | 316.9       | 0.3                          | 29.9      | 0.0      |

**Table 2.** Comparison of characteristic penetration length (CPL), desorbed mass, and mass in pores for ssDSC samples

| Sample name | TiO <sub>2</sub> thickness<br>[μm] | Spiro-MeOTAD concentration<br>[mg mL <sup>-1</sup> ] | Filling fraction<br>[%] | Calculated mass in pores<br>[μg/mm <sup>2</sup> ] | Calculated mass<br>[μg/mm <sup>2</sup> ] | Desorbed mass<br>[μg/mm <sup>2</sup> ] | CPL<br>[μm] | CPL with viscosity correction<br>[μm] |
|-------------|------------------------------------|------------------------------------------------------|-------------------------|---------------------------------------------------|------------------------------------------|----------------------------------------|-------------|---------------------------------------|
| 12          | 2                                  | 200                                                  | 89.4                    | 1.22                                              | 1.80                                     | 1.17                                   | 1.79        | 1.32                                  |
| 16          | 2                                  | 200                                                  | 89.5                    | 1.22                                              | 1.73                                     | 1.11                                   | 1.79        | 1.32                                  |
| 13          | 2                                  | 100                                                  | 37.8                    | 0.51                                              | 0.70                                     | 0.57                                   | 0.76        | 0.70                                  |
| 32          | 3                                  | 100                                                  | 28.6                    | 0.58                                              | 0.59                                     | 0.53                                   | 0.86        | 0.79                                  |
| 15          | 2.3                                | 25                                                   | 8.3                     | 0.13                                              | 0.13                                     | 0.12                                   | 0.19        | 0.18                                  |
| 34          | 3.7                                | 25                                                   | 6.1                     | 0.15                                              | 0.15                                     | 0.14                                   | 0.22        | 0.22                                  |
| Average [a] | 2.4                                | 200                                                  | 80.9                    | 1.25                                              | 1.78                                     | 1.14                                   | 1.86        | 1.36                                  |
| (std dev.)  | (0.6)                              |                                                      | (13.2)                  | (0.1)                                             | (0.15)                                   | (0.04)                                 | (0.1)       | (0.1)                                 |
| Average [b] | 3.7                                | 180                                                  | 80.9                    | 1.25                                              | 1.78                                     | 1.14                                   | 1.86        | 1.36                                  |
| (std dev.)  | (1.2)                              |                                                      | (13.2)                  | (0.1)                                             | (0.15)                                   | (0.04)                                 | (0.1)       | (0.1)                                 |
| Average [c] | 2.31                               | 100                                                  | 35.9                    | 0.53                                              | 0.69                                     | 0.62                                   | 0.78        | 0.72                                  |
| (std dev.)  | (0.6)                              |                                                      | (11.6)                  | (0.05)                                            | (0.15)                                   | (0.12)                                 | (0.1)       | (0.1)                                 |
| Average [d] | 2.25                               | 25                                                   | 8.9                     | 0.13                                              | 0.21                                     | 0.13                                   | 0.19        | 0.18                                  |
| (std dev.)  | (0.8)                              |                                                      | (2.0)                   | (0.01)                                            | (0.07)                                   | (0.01)                                 | (0.02)      | (0.02)                                |

[a] Average of 6 samples with thicknesses between 2 and 3.3 μm; [b] Average of 3 samples with thicknesses between 2.6 and 5 μm; [c] Average of 7 samples with thicknesses between 1.4 and 3.1 μm; [d] Average of 6 samples with thicknesses between 1.4 and 3.7 μm.
